# Supplementary material
Source: publisher figshare collection journal article supplement (https://tandf.figshare.com/ndownloader/files/12281681)

**Supplementary Information**

Synthesis of some novel orsellinates and lecanoric acid related depsides as α-glucosidase inhibitors

**Boddu Rama Krishnaa,c, Sistla Ramakrishnab,c, Sangaraju Rajendrab,c, Kuncha Madhusudanab, Uppuluri Venkata Mallavadhania,c,**

aNatural Products Chemistry Division, CSIR-Indian Institute of Chemical Technology,

Hyderabad 500007, India

bDepartment of Pharmacology & toxicology, CSIR-Indian Institute of Chemical Technology,

Hyderabad 500007, India

cAcademy of Scientific and Innovative Research (AcSIR), CSIR-Indian Institute of Chemical

Technology, Hyderabad 500007, India

**List of Contents**

| **S. No** | **Compounds No** |
| --- | --- |
| 1 | 1H NMR, 13C NMR & HRMS spectra of compound  **(3a)** |
| 2 | 1H NMR, 13C NMR & HRMS spectra of compound **(3b)** |
| 3 | 1H NMR, 13C NMR & HRMS spectra of compound  **(3c)** |
| 4 | 1H NMR, 13C NMR & HRMS spectra of compound **(6a)** |
| 5 | 1H NMR, 13C NMR & HRMS spectra of compound **(6b)** |
| 6 | 1H NMR, 13C NMR & HRMS spectra of compound **(6c)** |
| 7 | 1H NMR, 13C NMR & HRMS spectra of compound **(6d)** |
| 8 | 1H NMR, 13C NMR & HRMS spectra of compound **(6e)** |
| 9 | 1H NMR, 13C NMR & HRMS spectra of compound **(6f)** |
| 10 | 1H NMR, 13C NMR & HRMS spectra of compound **(6g)** |
| 11 | 1H NMR, 13C NMR & HRMS spectra of compound **(6h)** |
| 12 | 1H NMR, 13C NMR & HRMS spectra of compound **(6i)** |
| 13 | 1H NMR, 13C NMR & HRMS spectra of compound  **(6j)** |
| 14 | 1H NMR, 13C NMR & HRMS spectra of compound **(6k)** |
| 15 | 1H NMR, 13C NMR & HRMS spectra of compound **(6l)** |
| 16 | 1H NMR, 13C NMR & HRMS spectra of compound **(4)** |
| 17 | 1H NMR, 13C NMR & HRMS spectra of compound  **(7a)** |
| 18 | 1H NMR, 13C NMR & HRMS spectra of compound **(7b)** |
| 19 | 1H NMR, 13C NMR & HRMS spectra of compound  **(7c)** |
| 20 | 1H NMR, 13C NMR & HRMS spectra of compound **(7d)** |


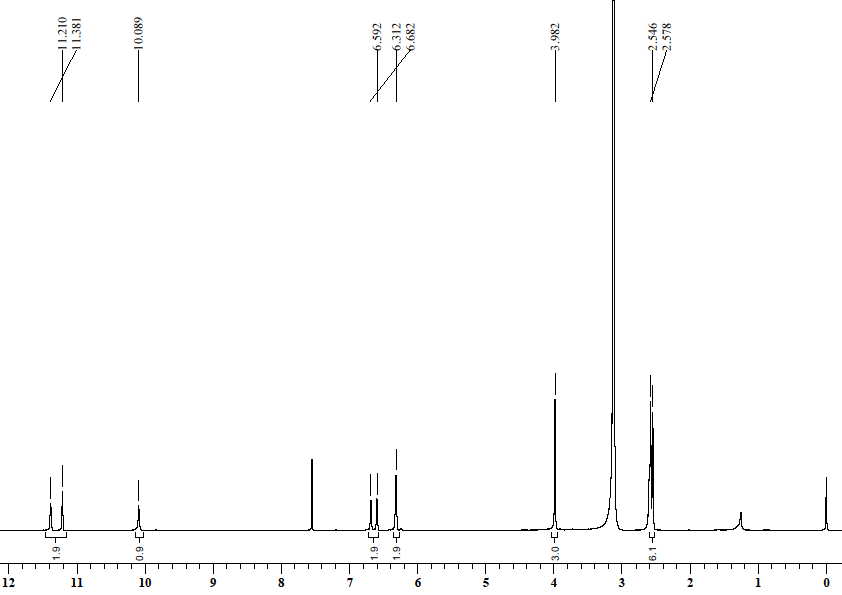

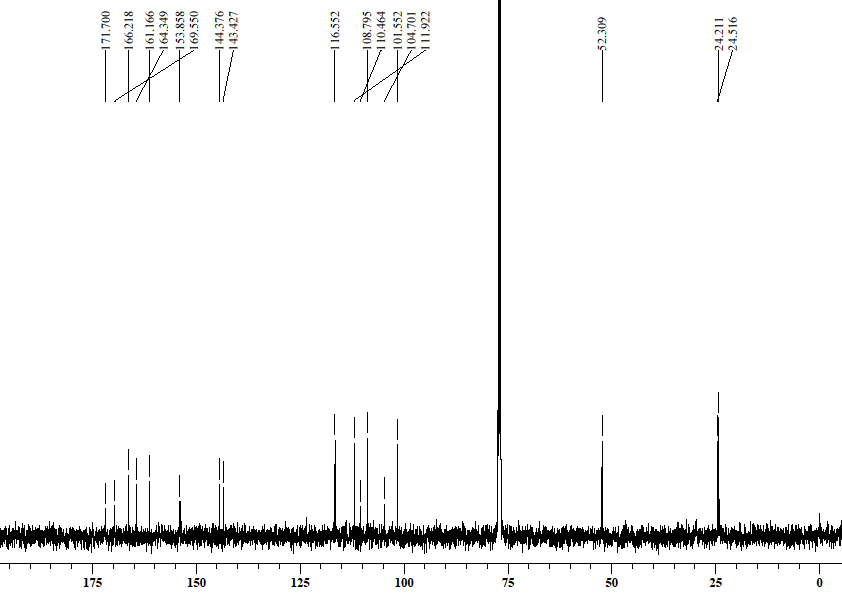

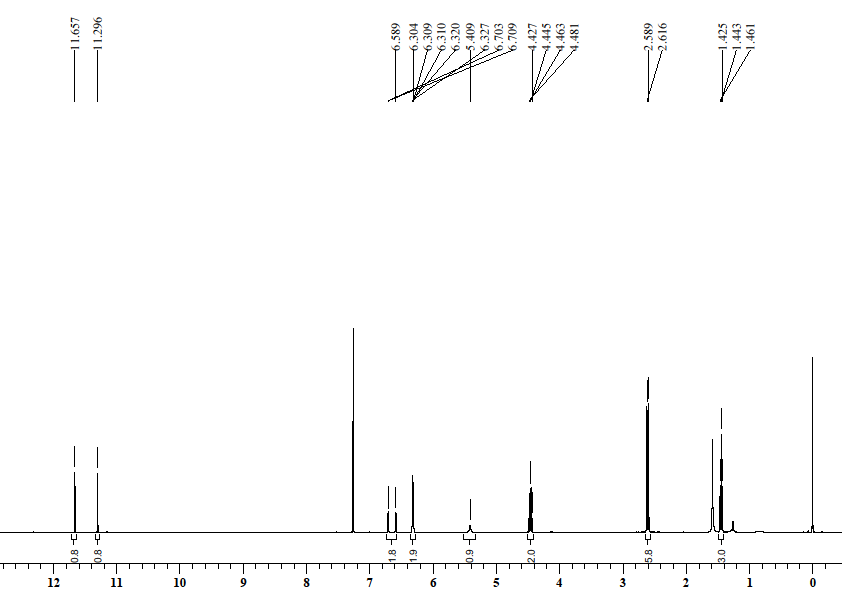

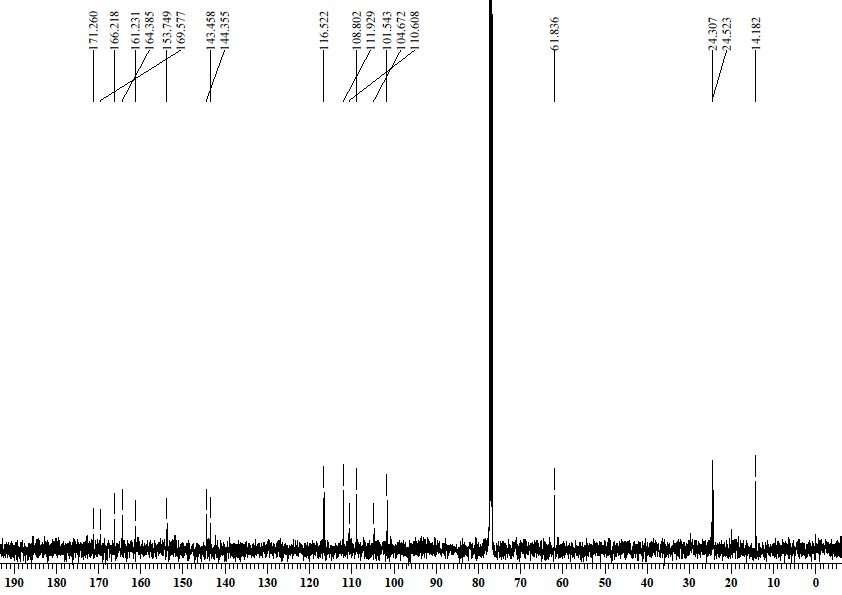

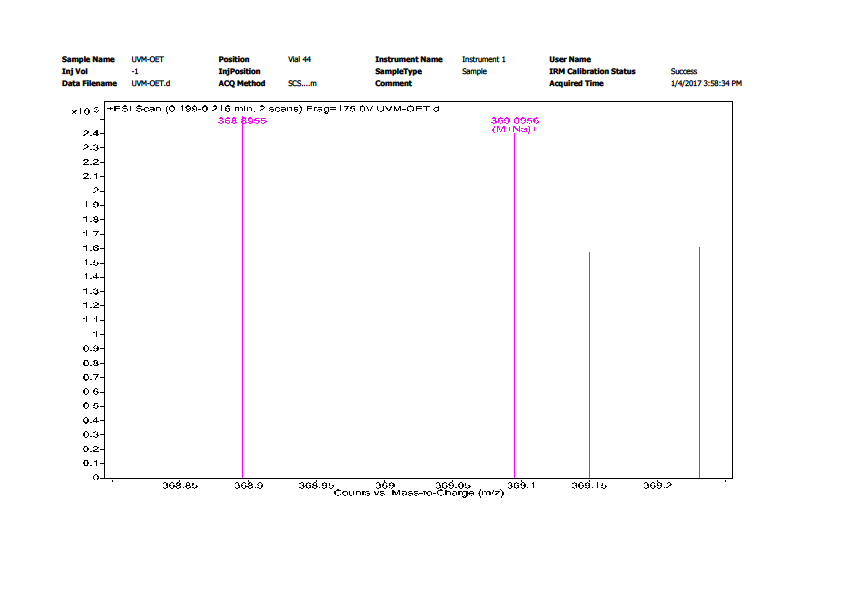

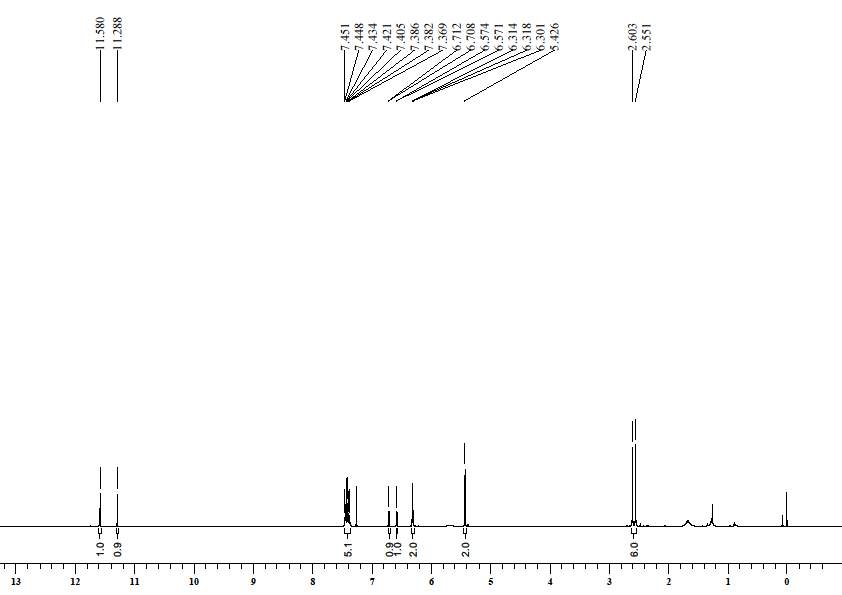

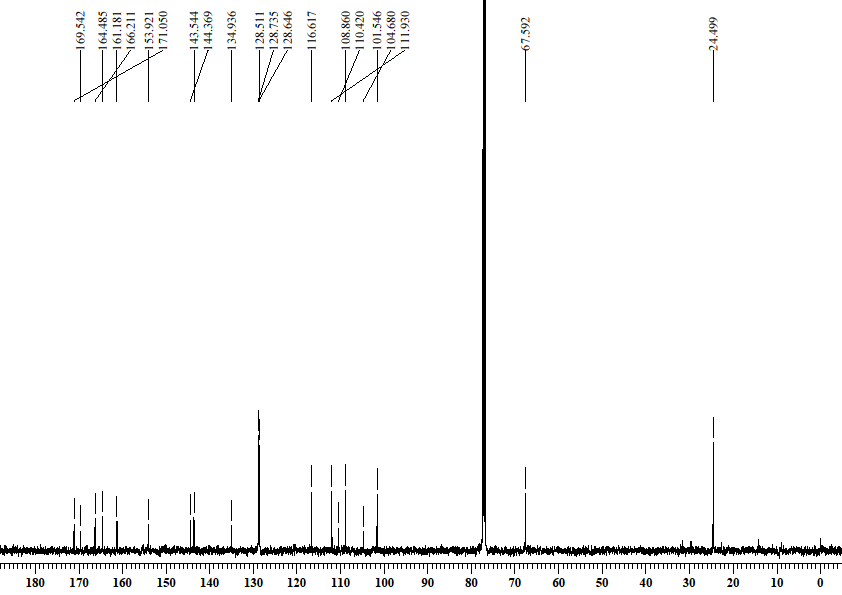

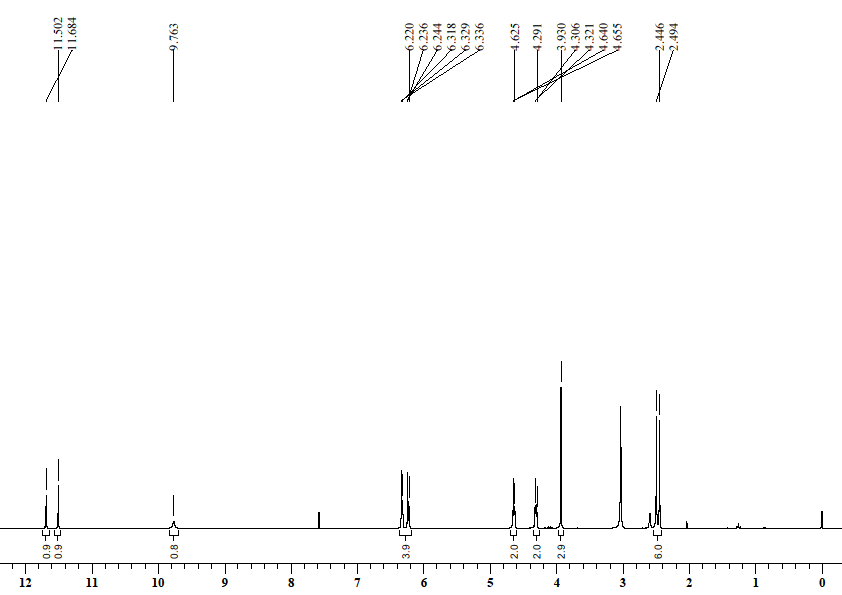

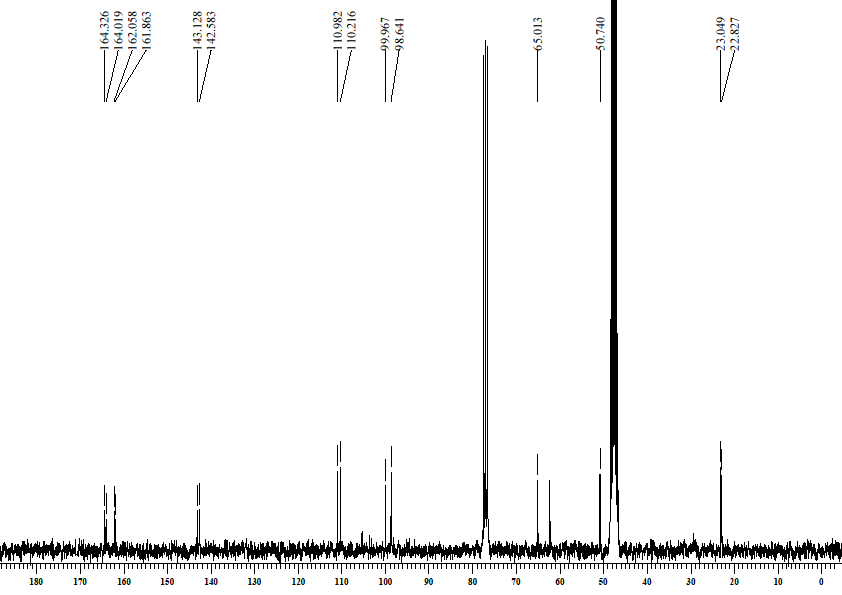

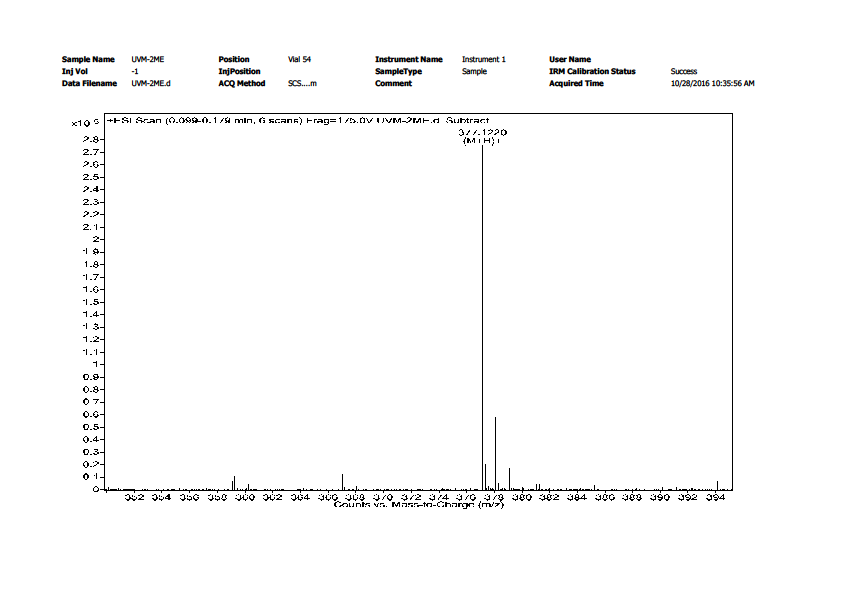

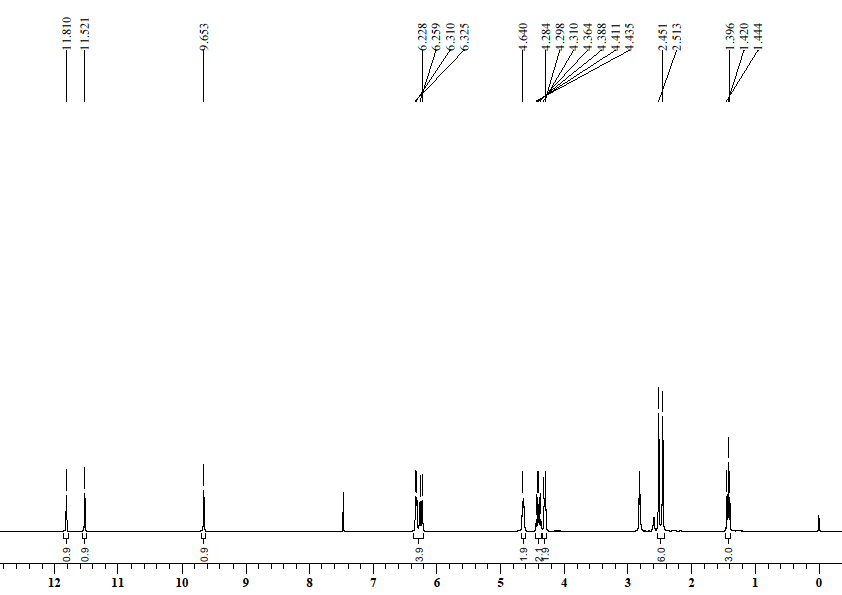

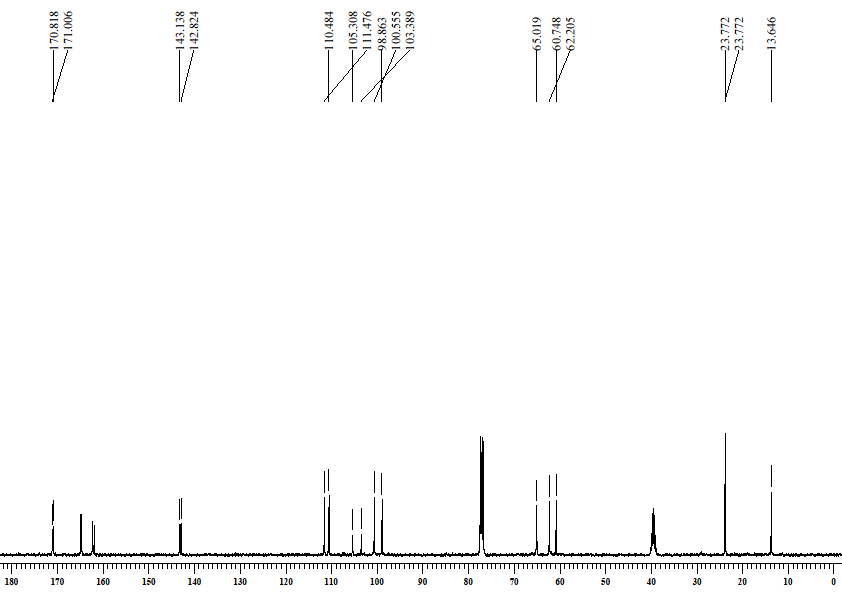

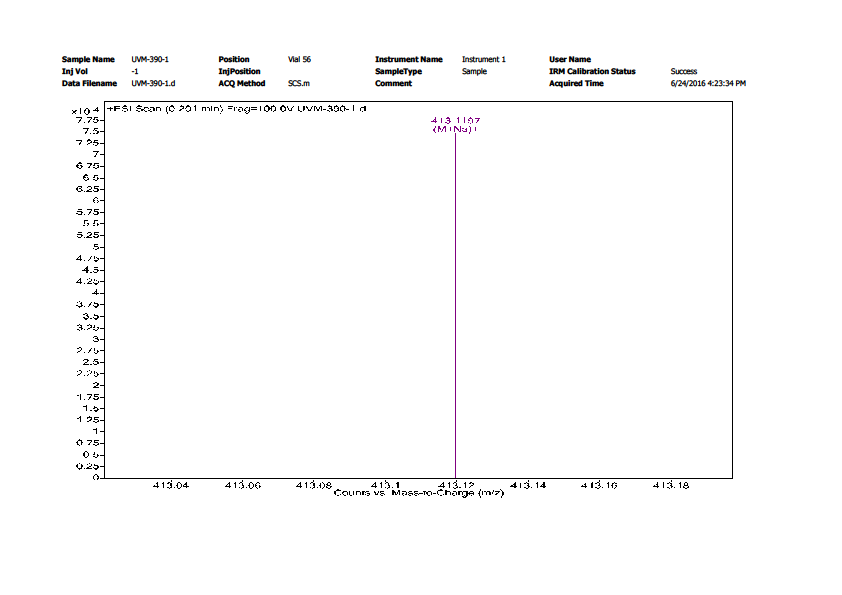

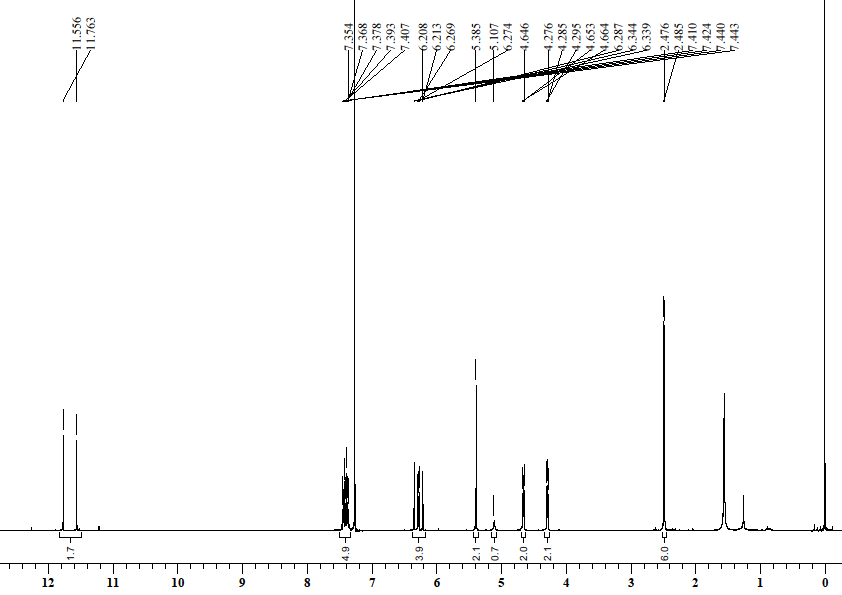

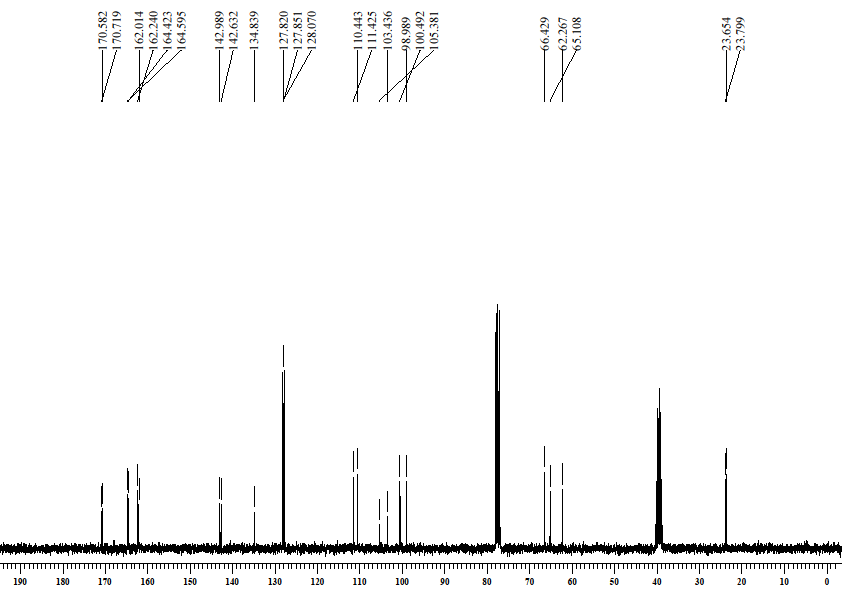

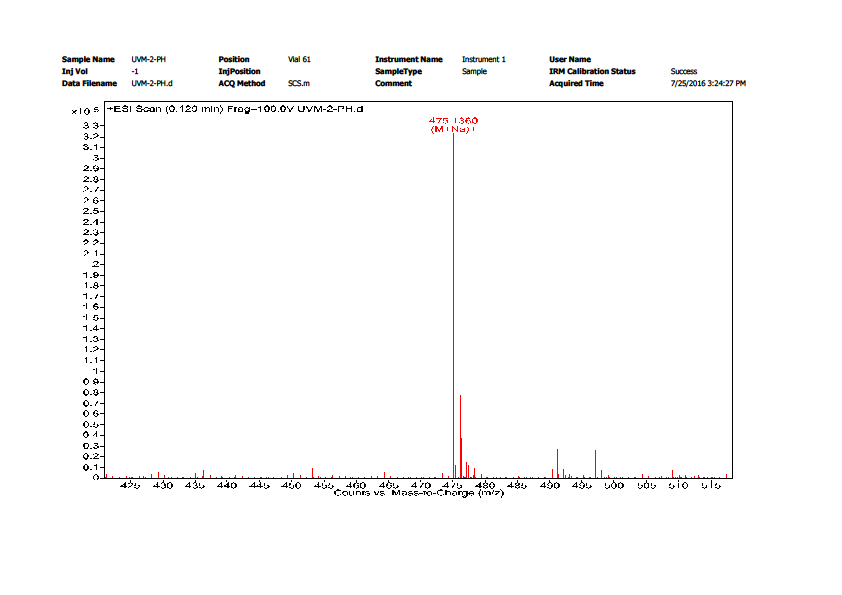

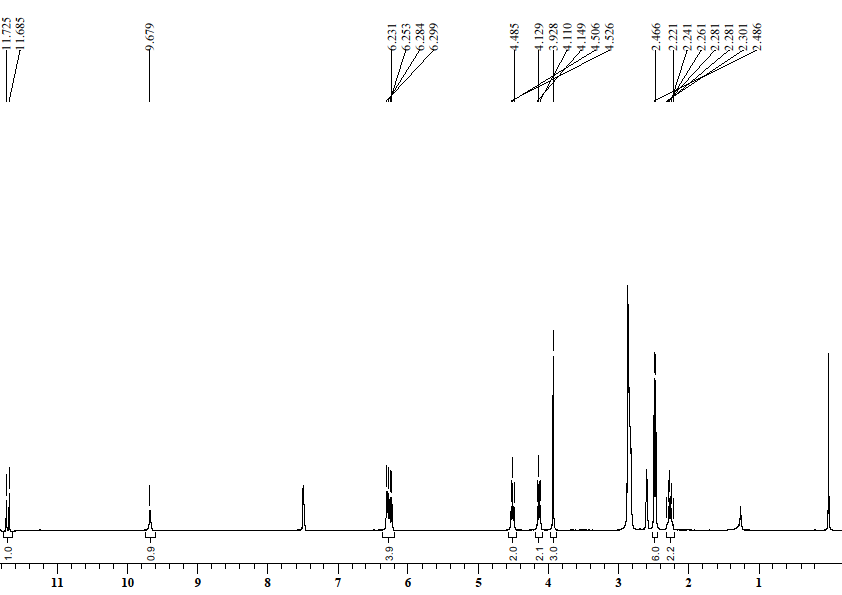

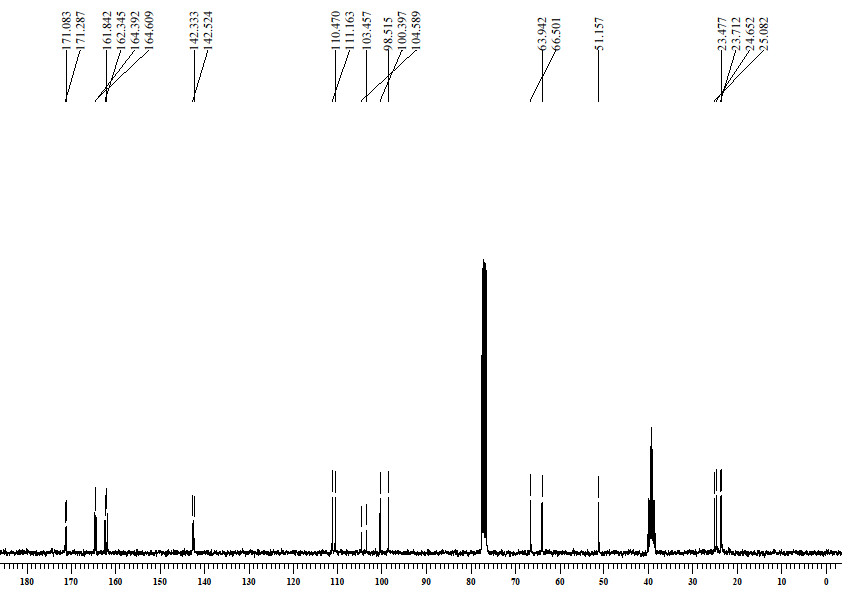

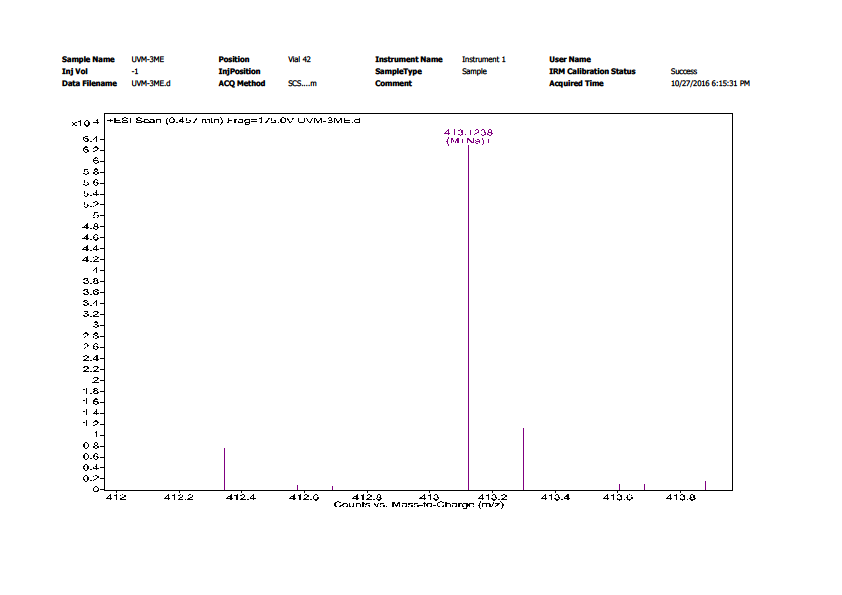

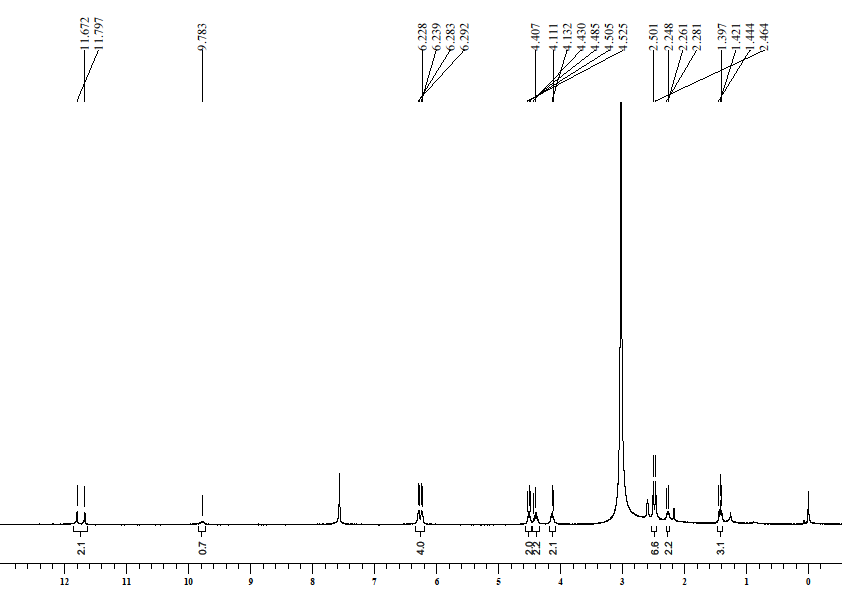

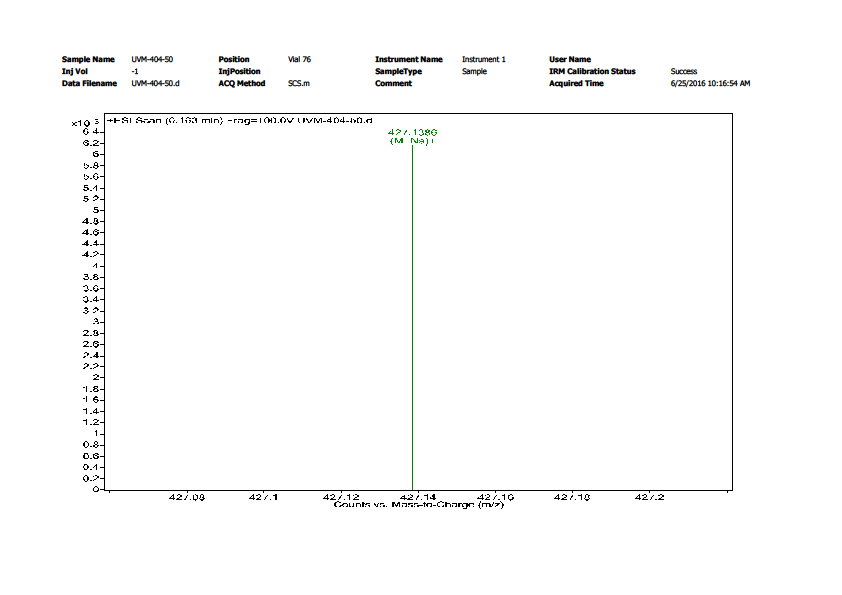

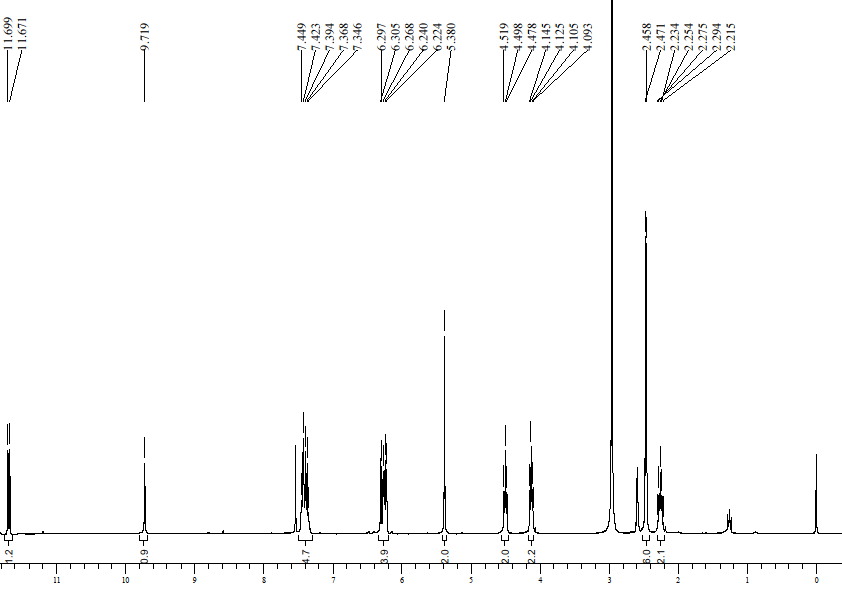

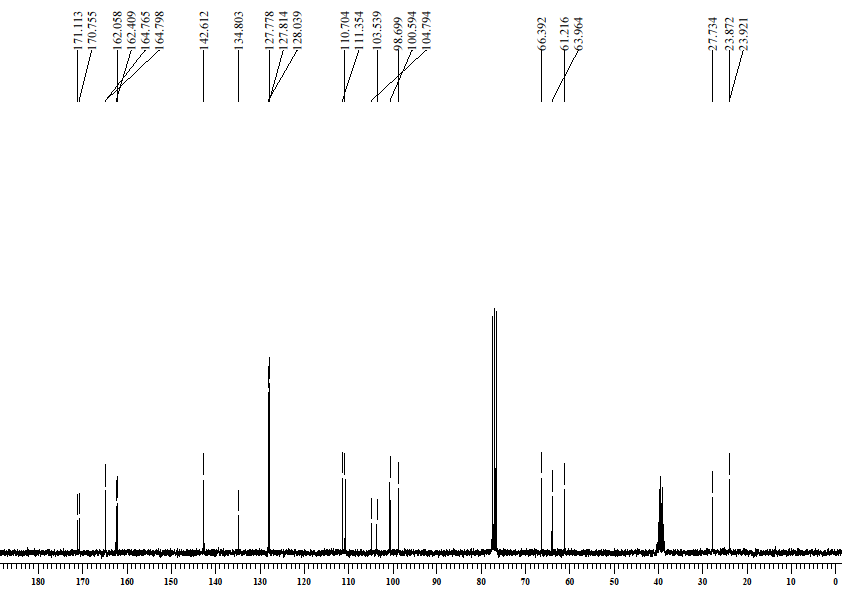

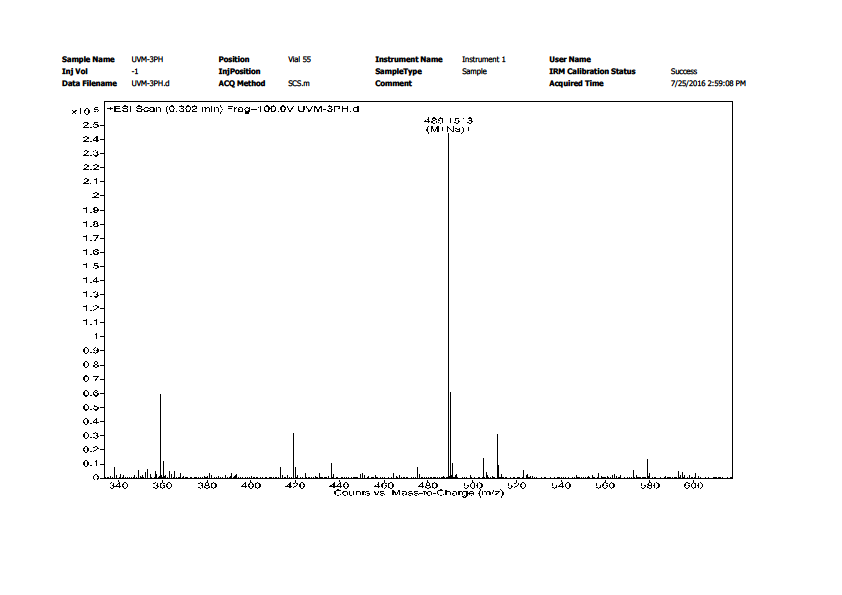

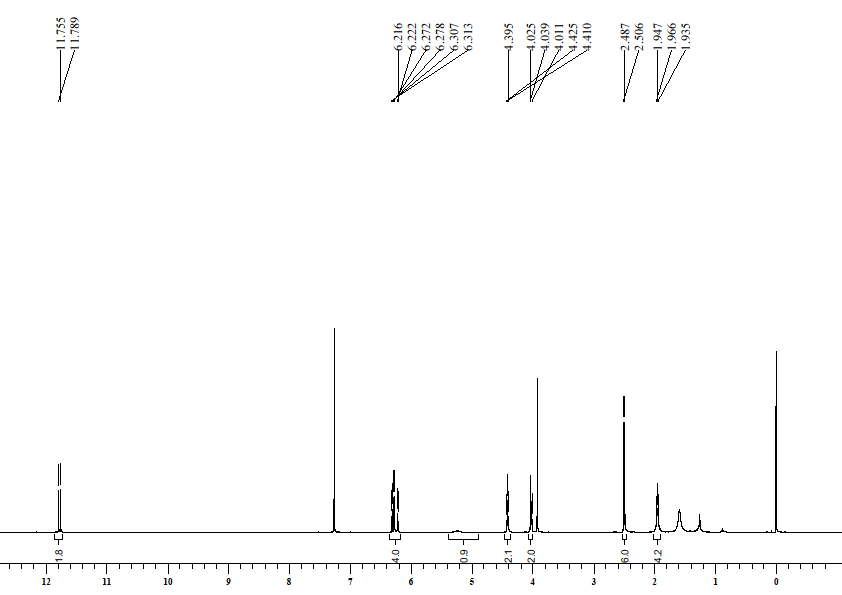

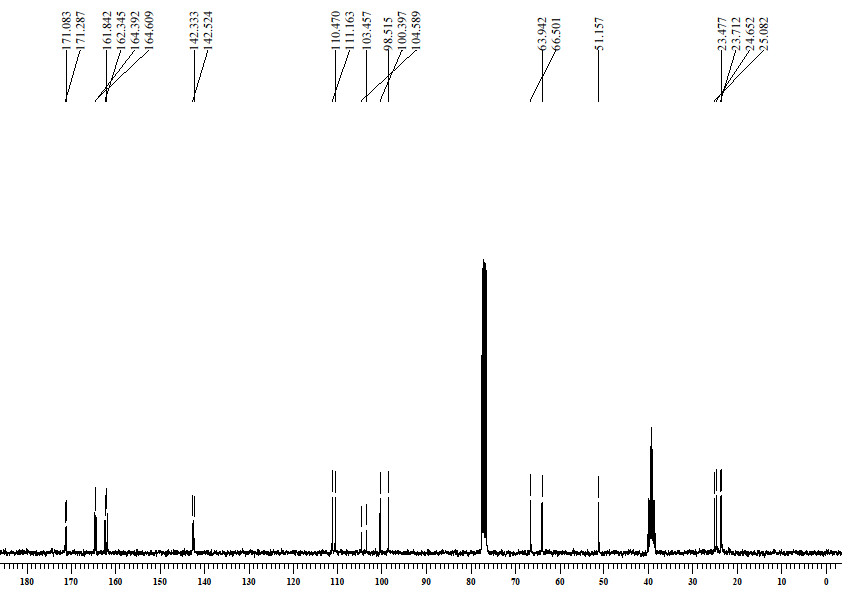

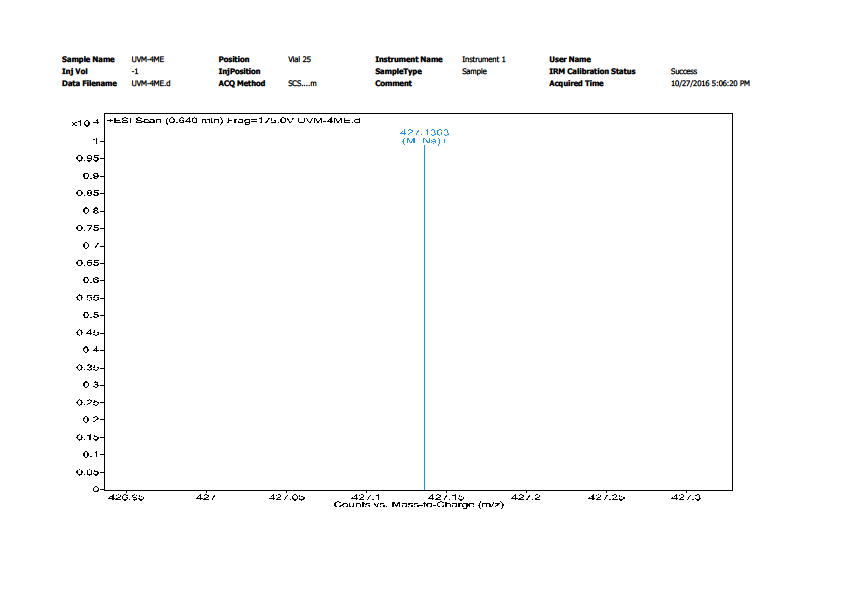

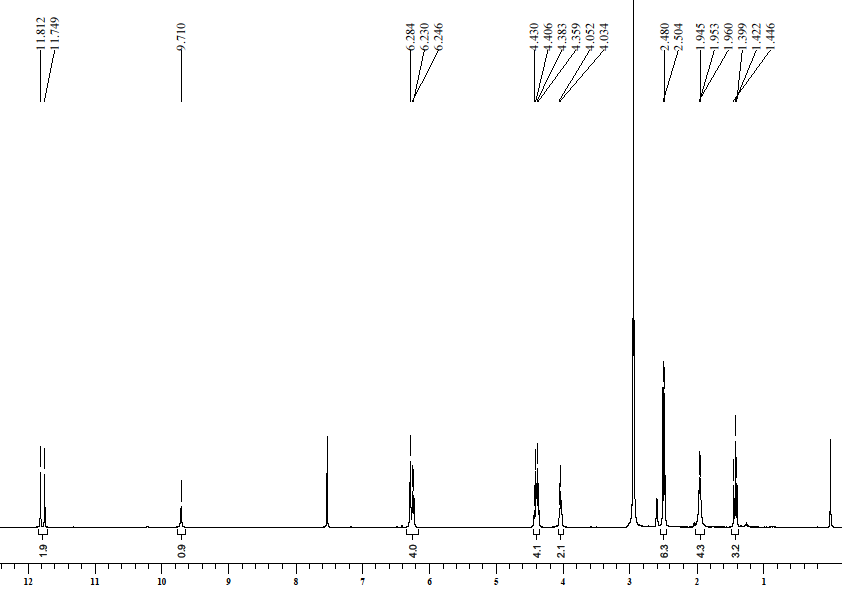

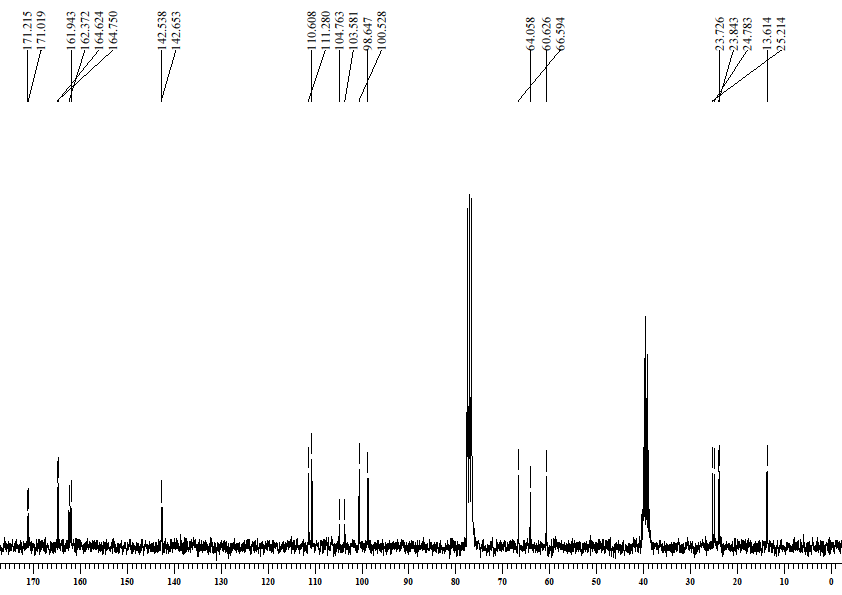

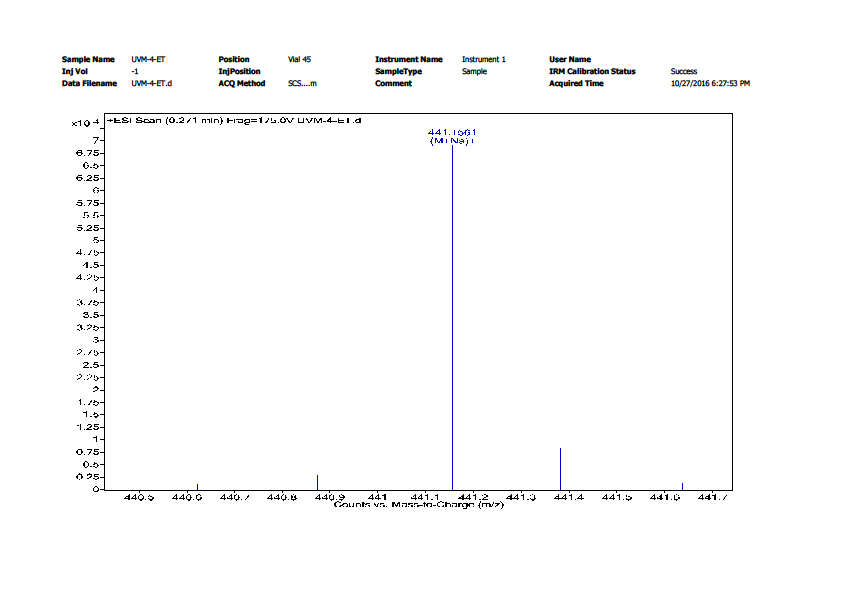

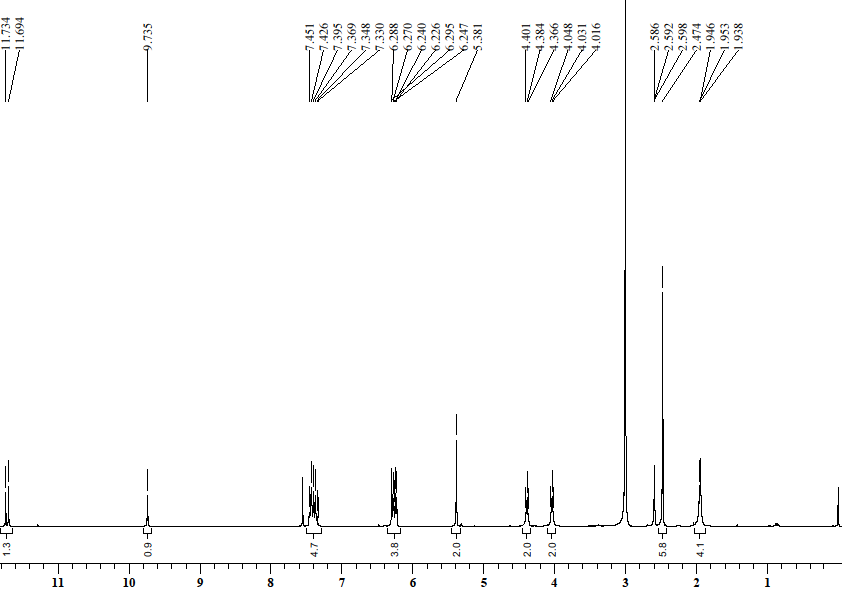

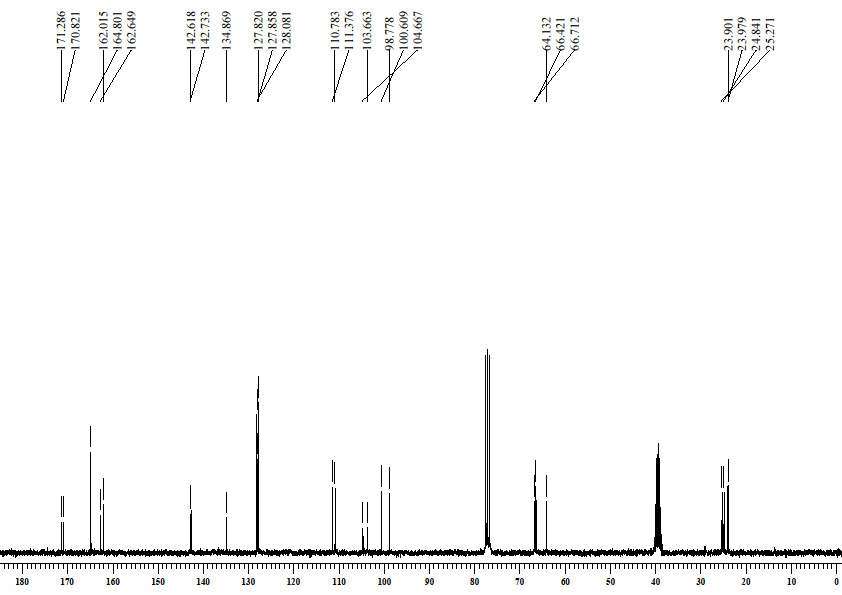

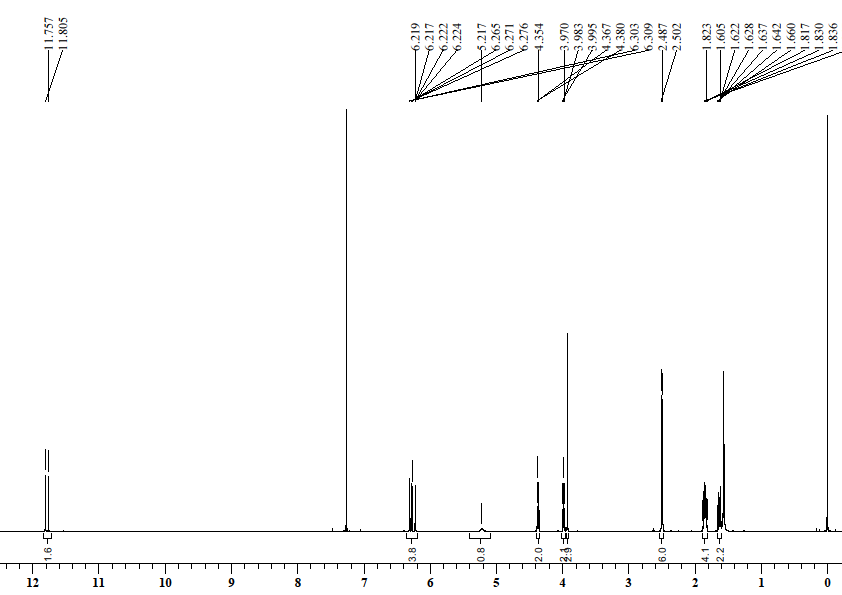

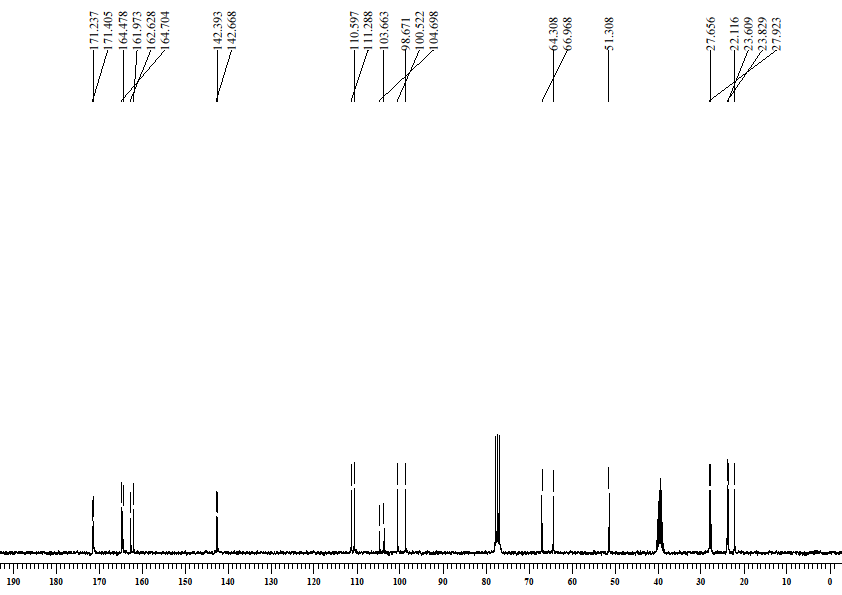

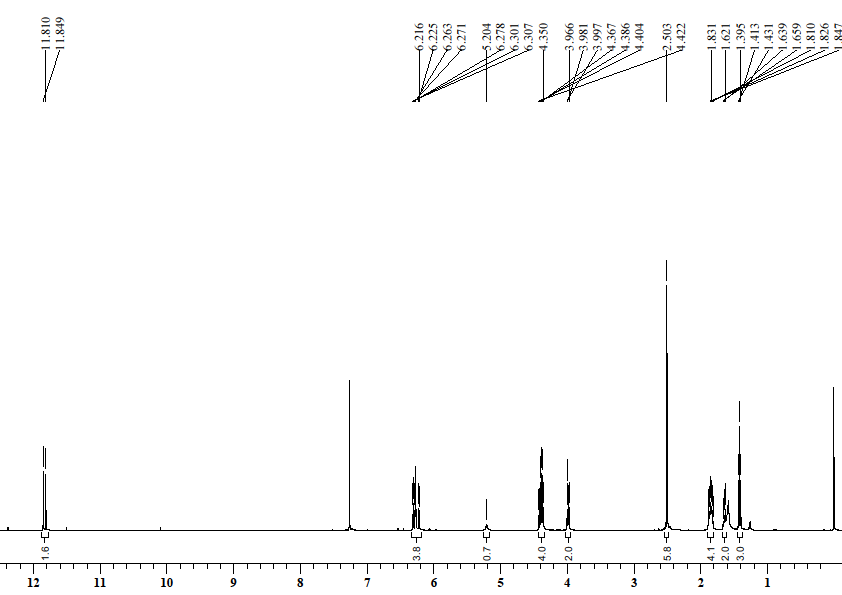

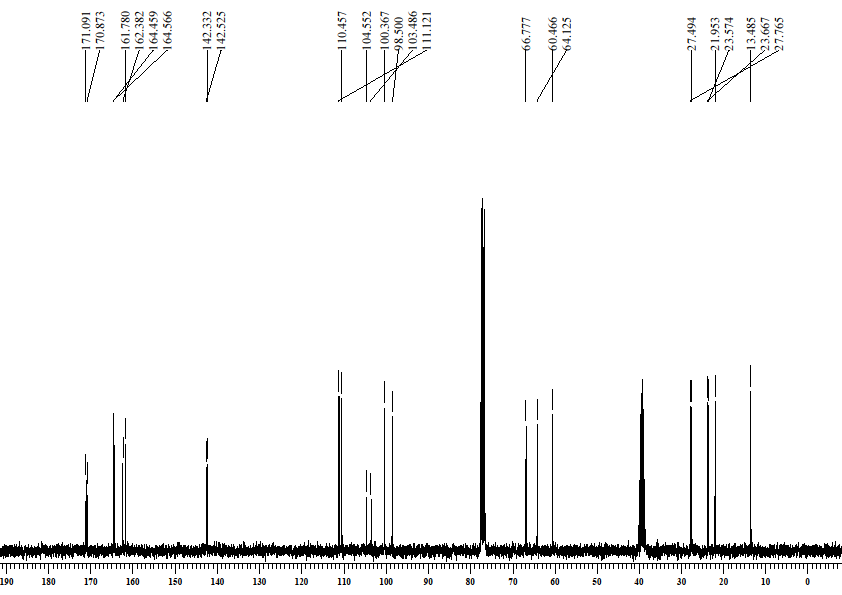

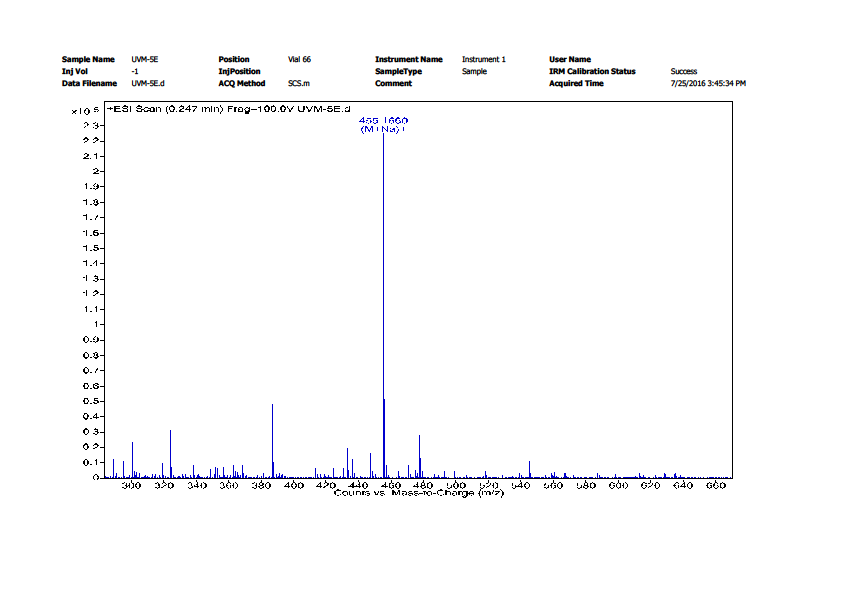

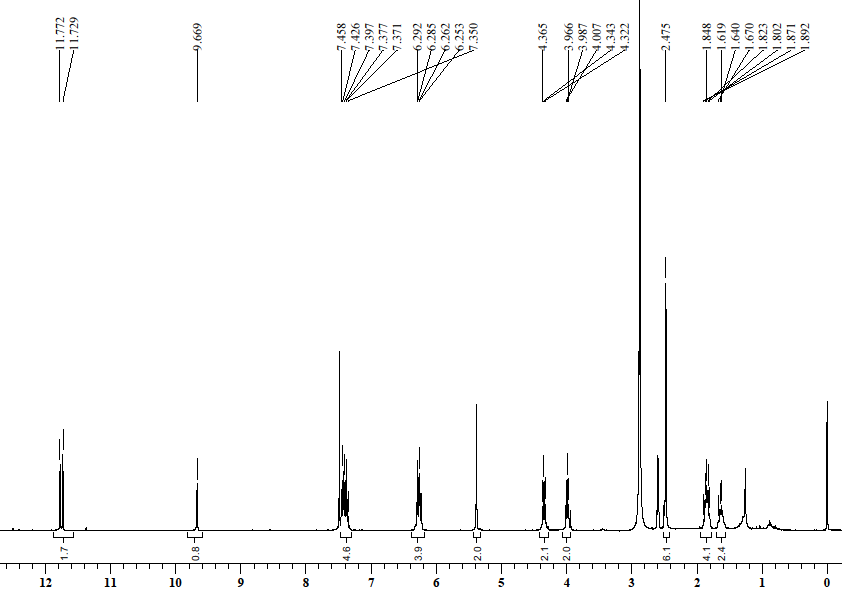

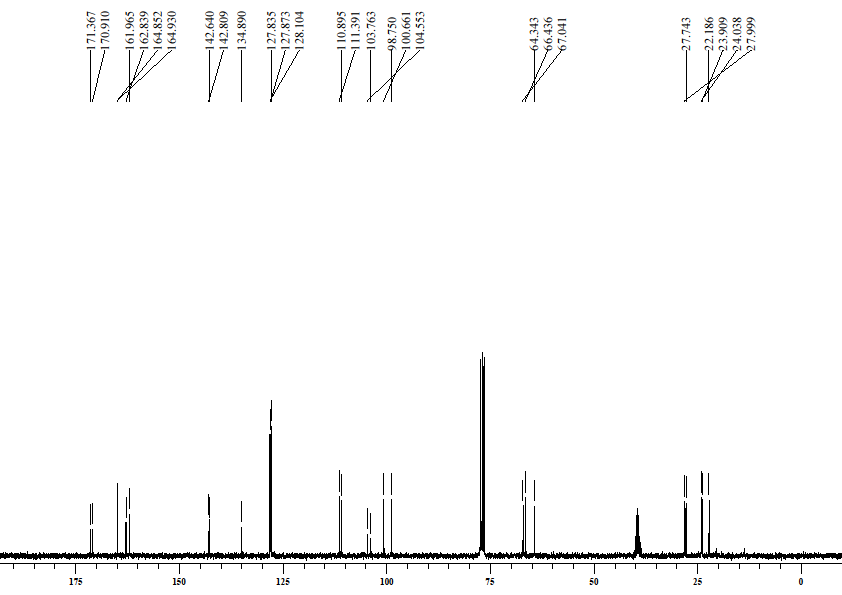

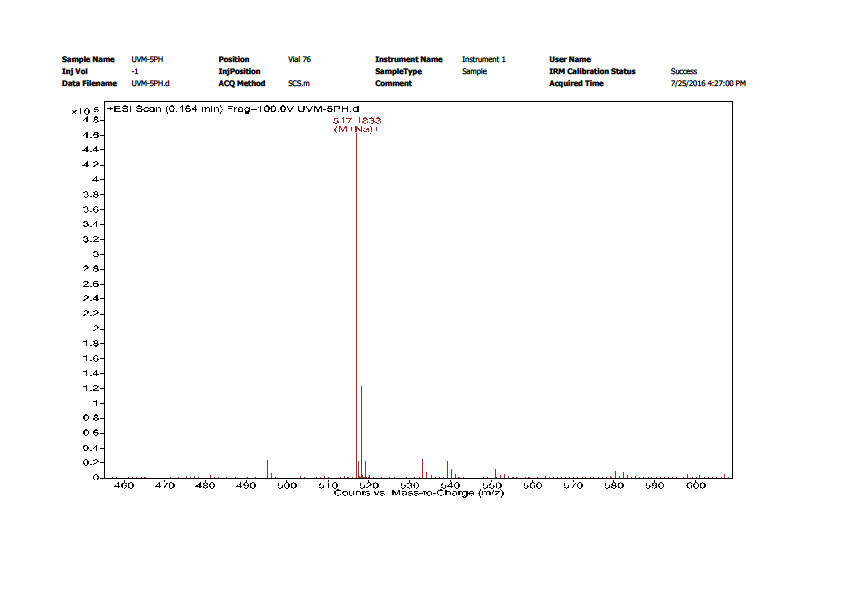

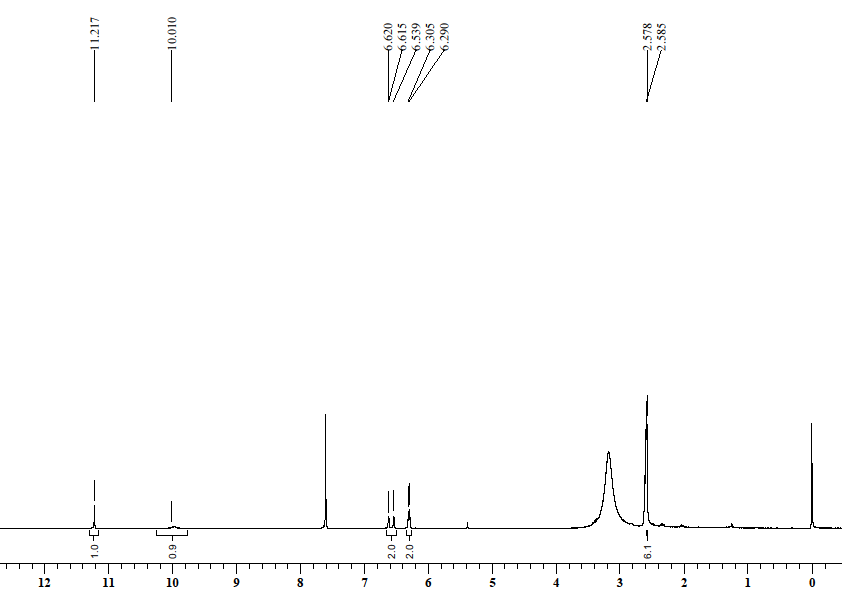

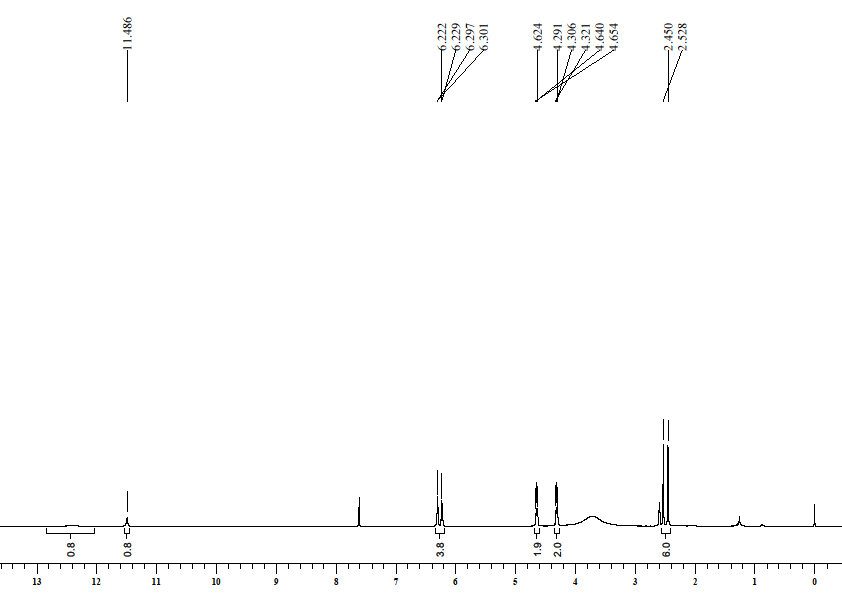

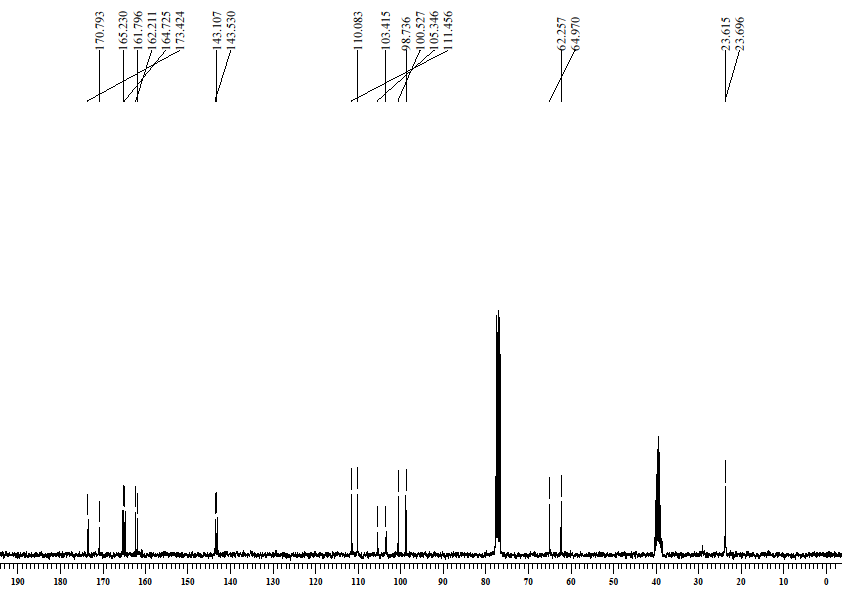

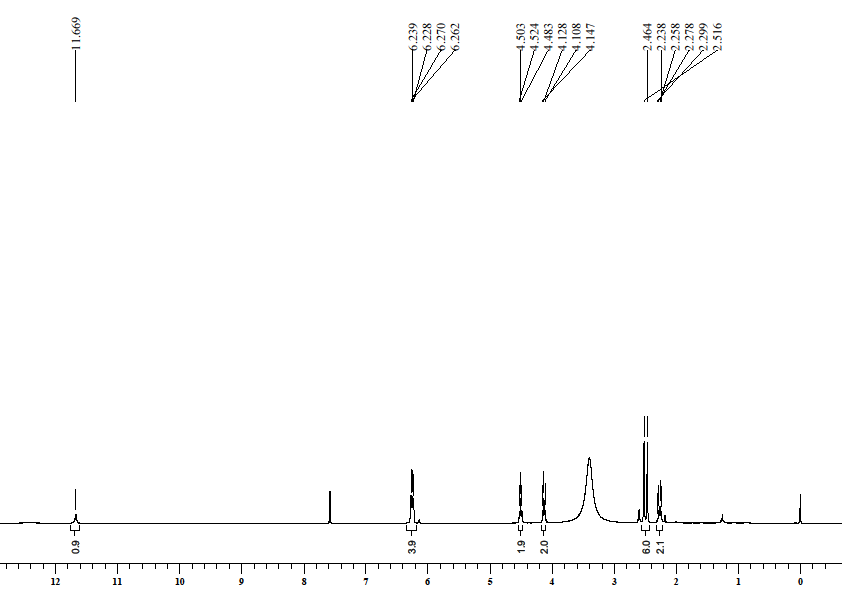

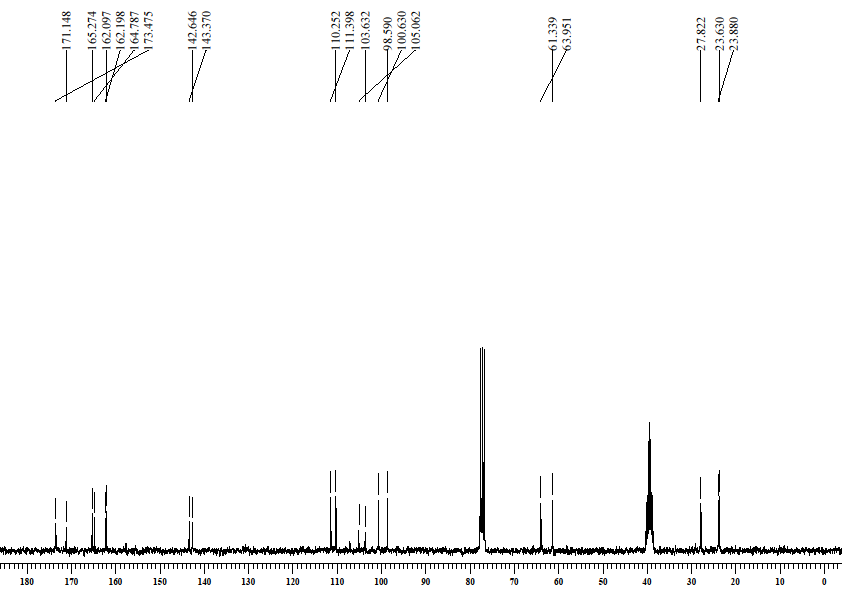

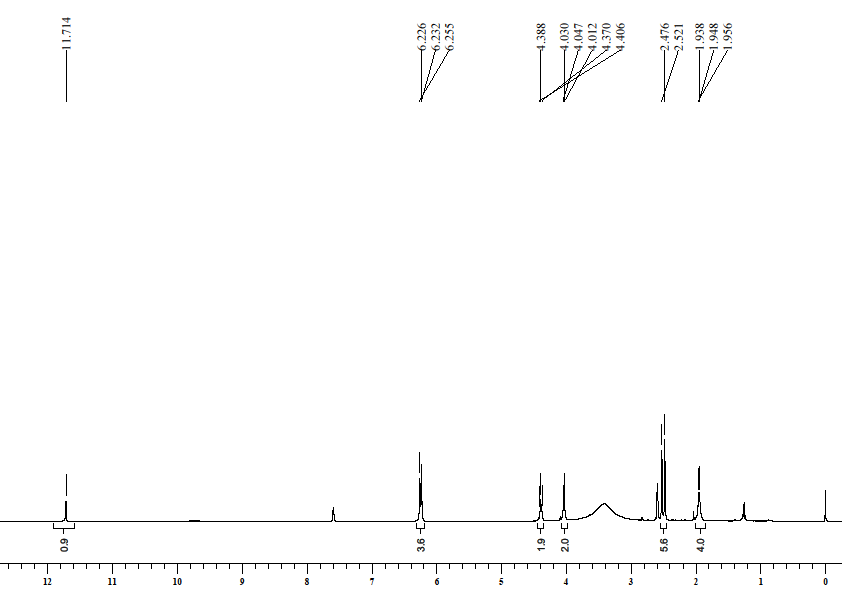

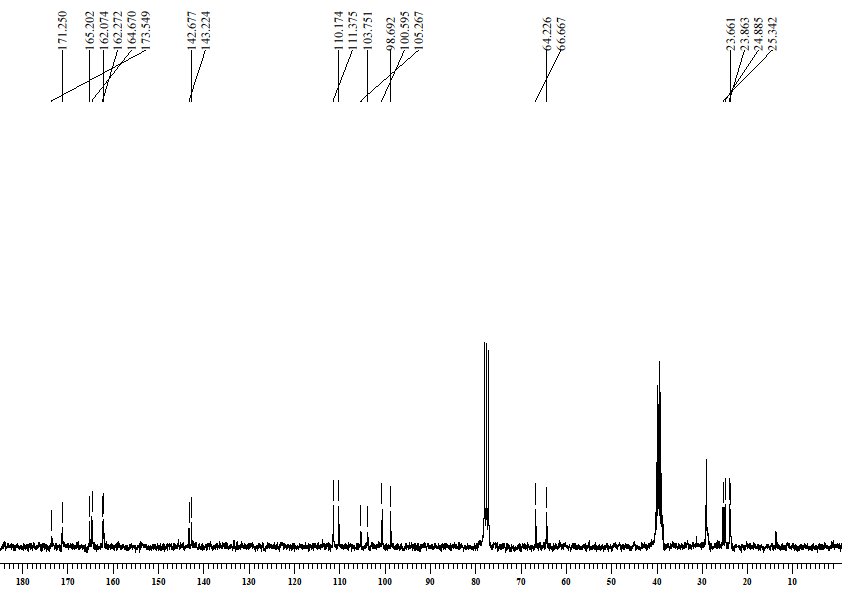

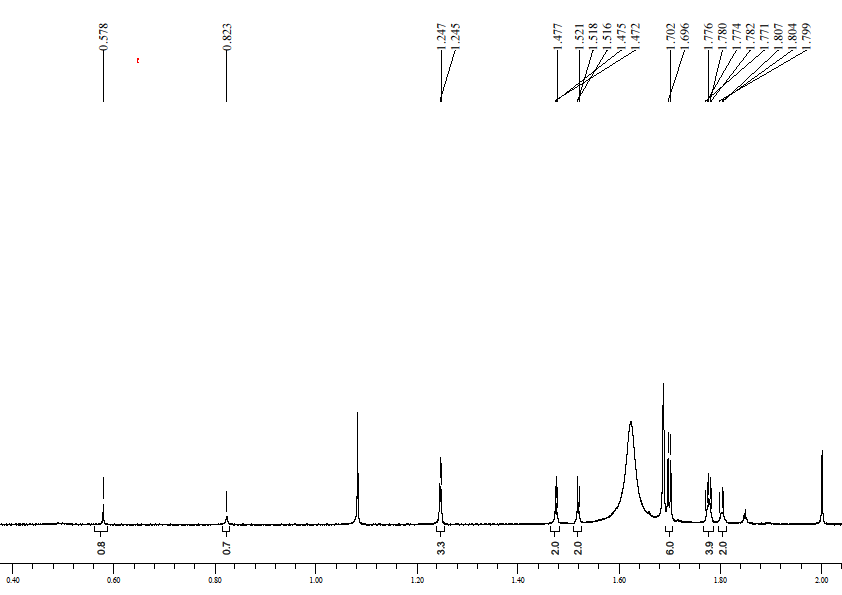

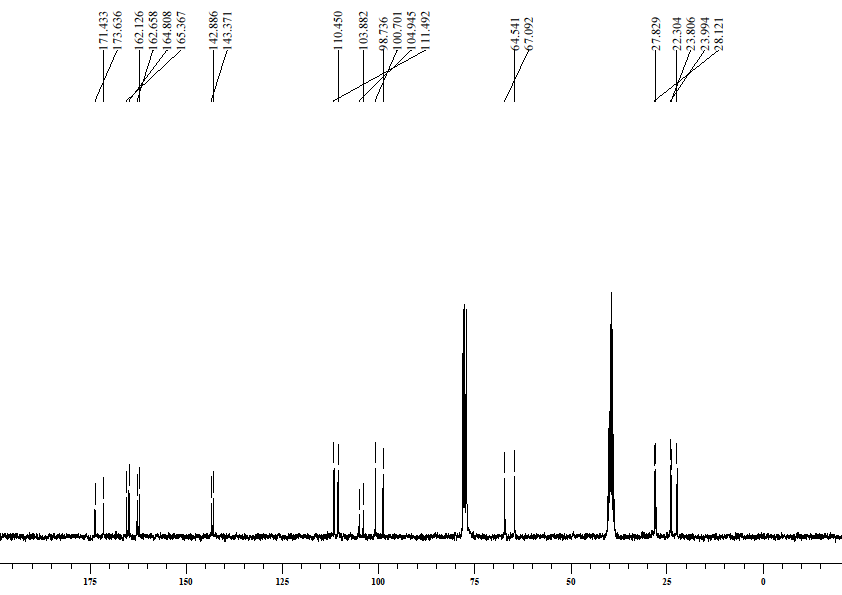

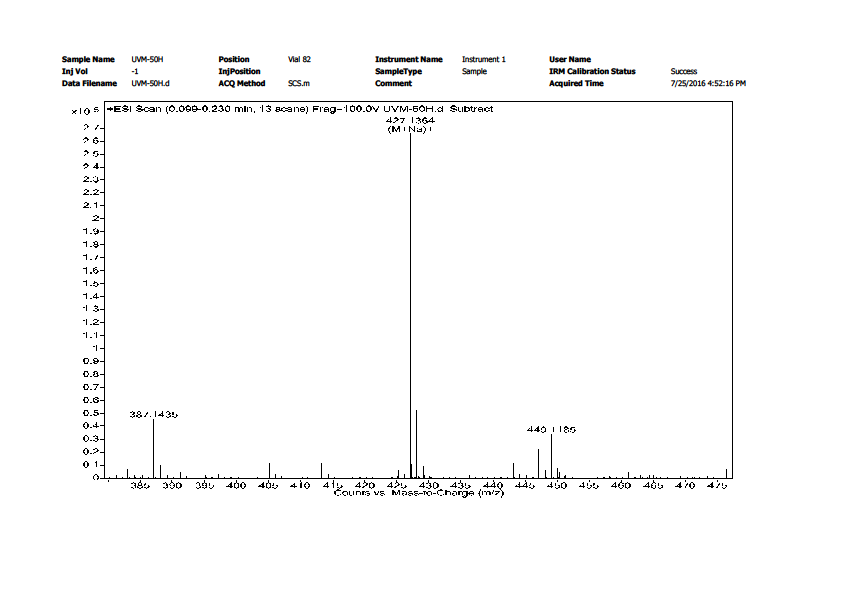

Supplement: Supplementary file 1 [file 12281681]
